# Supplementary material for: A methodology for the spatiotemporal identification of compound hazards: wind and precipitation extremes in Great Britain (1979–2019)
Source: Copernicus journal article supplement (doi:10.5194/esd-13-993-2022), 2022-06-14
Supplement: Supplementary file 1 [file esd-13-993-2022-supplement.zip]

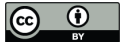

## *Supplement of*

# **A methodology for the spatiotemporal identification of compound hazards: wind and precipitation extremes in Great Britain (1979–2019)**

**Aloïs Tilloy et al.**

*Correspondence to:* Aloïs Tilloy (alois.tilloy@ec.europa.eu)

- esd-13-993-2022-supplement-title-page.pdf
- ESD\_2021\_52\_sup
  - ESD-2021-52\_Supplement.1\_2.docx
  - ESD-2021-52\_Supplement.3
    - S3.1.windcluster.csv
    - S3.2.precipclusters.csv
    - S3.3.compoundclusters.csv
    - S3.Key.xlsx
    - SI-CH\_database\_key.xlsx
  - ESD-2021-52\_Supplement.4\_GB\_Significant\_Weather Events\_Catalogue\_1979–2019.xlsx
  - ESD-2021-52\_Supplement\_key.docx

The copyright of individual parts of the supplement might differ from the article licence.
